# Supplementary material
Source: Elsevier journal article supplement (https://comptes-rendus.academie-sciences.fr/geoscience/article/10.1016/j.crte.2015.04.005/file/attach/mmc2.pdf)
Supplement: mmc2 [file mmc2.pdf]

Table S1: List of sampled waters from the White Sea watershed and their main characteristics

| River           | Water ID | Lat        | Long       | Sampling date (d/m/yr) | Type | Flow | Comments                                                            | Bedrock Lithology / Tributary type                                  |
|-----------------|----------|------------|------------|------------------------|------|------|---------------------------------------------------------------------|---------------------------------------------------------------------|
| <b>Zone 1</b>   |          |            |            |                        |      |      |                                                                     |                                                                     |
| Ruiga           | 9        | 63°45'43"N | 35°47'13"E | 25.07.2004             | II   | BF   | Upper reaches                                                       |                                                                     |
| Ladreka         | 23       | 64°17'02"N | 35°18'52"E | 06.08.2004             | II   | BF   | 100 m above the bridge, freshwater                                  |                                                                     |
| Yukovo          | Y-1      | 64°22'58"N | 35°36'36"E | 15.02.2006             | III  | BF   | Stagnant surface water under 20 cm of ice                           |                                                                     |
| Yukovo          | Y-3      | 64°21'31"N | 35°40'51"E | 16.02.2006             | III  | BF   | Stream from wetland zone, under ice 5-7 cm                          | Archean Granite, Marine deposits (sand, clay) and peat              |
| Yukovo          | Y-2      | 64°21'19"N | 35°40'44"E | 15.02.2006             | IV   | BF   | Groundwater (pit)                                                   |                                                                     |
| Yukovo          | Y-4      | 64°21'39"N | 35°40'50"E | 16.02.2006             | IV   | BF   | Water lenses trapped in the ice at the tidal zone (connected to Y3) |                                                                     |
| Yukovo          | Y-5      | 64°21'37"N | 35°40'56"E | 16.02.2006             | IV   | BF   | Superficial flow frozen in form of stalactites                      |                                                                     |
| <b>Zone 2</b>   |          |            |            |                        |      |      |                                                                     |                                                                     |
| Peschanaya      | S-32     | 66°12'03"N | 43°40'12"E | 23.08.2006             | III  | BF   | Small stream (200-300 m length) from coastal wetland zone           |                                                                     |
| Peschanaya      | S-40     | 66°12'00"N | 43°32'12"E | 24.08.2006             | IV   | BF   | Soil pit water in the coastal bog discharging to the sea            | Glacial morens (sand) and peat                                      |
| <b>Zone 3</b>   |          |            |            |                        |      |      |                                                                     |                                                                     |
| Severnaya Dvina | A-3 F    | 64°40'24"N | 40°33'11"E | 28.02.2007             | I    | BF   | Ekonomiya monitoring point (13h20)                                  | Carbonate P, K; clays (Q), sand (Q), claystone and sandstone (J, T) |
| Severnaya Dvina | A-18     | 64°27'04"N | 40°40'54"E | 6.05.2007              | I    | HF   | Surface, above the city (M-12 Volodia)                              |                                                                     |
| Severnaya Dvina | A-28     | 64°00'00"N | 41°09'17"E | 18.06.2007             | I    | BF   | Above the bridge (Arkhangelsk), left bank                           |                                                                     |
| Ilasskoe Bog    | A-19     | 64°19'40"N | 40°36'41"E | 7.05.2007              | IV   | HF   | Ombrotrophic bog                                                    | Ombrotrophic bog (peat deposits) on limestones (K)                  |
| Ilasskoe Creek  | A-20     | 64°19'57"N | 40°37'35"E | 7.05.2007              | III  | HF   | Creek from Ilasskoe bog near the railway                            |                                                                     |
| Pinega          | A-7      | 64°54'56"N | 43°27'08"E | 2.03.2007              | I    | BF   | Mainstream                                                          | Carbonate P, K, gypsum; less amount of clays (Q), sand (Q),         |
| Pinega          | A-27     | 64°54'56"N | 43°27'08"E | 23.05.2007             | I    | HF   | Mainstream (Golubino)                                               |                                                                     |
| Sotka           | A-8      | 64°07'34"N | 43°03'54"E | 3.03.2007              | I    | BF   | Mainstream                                                          | Carbonate P), gypsum (P1), clays (Q), sand (Q)                      |
| Sotka           | A-25     | 64°07'34"N | 43°03'54"E | 22.05.2007             | I    | HF   | Mainstream                                                          |                                                                     |

Type I: Large rivers 100 - 500,000 km<sup>2</sup>, Type II: Small rivers, S < 50 km<sup>2</sup>, Type III: Semi-permanent streams (1 - 10 km<sup>2</sup>)

Type IV: Stagnant (soil, wetland) water, soil pits close to coast high DOC

BF: Base flow, HF: High Flow

Table S2: List of sampled waters from the Copper River watershed in Alaska and their main characteristics and chemical compositions

| River                                                   | Water ID | Lat    | Long    | Type | Sample ID | Filtration | pH  | Fe (ug/L) | DOC (mg/L) | $\delta^{56}\text{Fe}$ | 2SD  | $\delta^{57}\text{Fe}$ | 2SD  | Note |
|---------------------------------------------------------|----------|--------|---------|------|-----------|------------|-----|-----------|------------|------------------------|------|------------------------|------|------|
| <b><i>Copper River (CR)</i></b>                         |          |        |         |      |           |            |     |           |            |                        |      |                        |      |      |
| CR above Chitina river                                  | 8        | 61.529 | 144.408 | GL   | AK-07     | <0.2um     | 7.9 | 600.0     |            | <b>0.09</b>            | 0.09 | <b>0.14</b>            | 0.40 |      |
| CR below Chitina river                                  | 10       | 61.482 | 144.452 | GL   | A22       | <0.45um    | 7.8 | 530.0     |            | <b>0.07</b>            | 0.06 | <b>0.10</b>            | 0.13 | *    |
| CR delta channel                                        | 26       | 60.445 | 145.08  | GL   | A25       | <0.45um    | 7.9 | 800.0     | 0.45       | <b>0.09</b>            | 0.06 | <b>0.15</b>            | 0.13 | *    |
|                                                         |          |        |         |      | AK-09     | <0.2um     | 7.9 | 798.9     |            | <b>0.07</b>            | 0.06 | <b>0.14</b>            | 0.31 |      |
| CR above childs glacier                                 | 33       | 60.673 | 144.755 | GL   | A14       | <0.45um    | 8.1 | 460.0     |            | <b>0.03</b>            | 0.06 | <b>0.20</b>            | 0.13 | *    |
| <b><i>Copper River tributaries and local waters</i></b> |          |        |         |      |           |            |     |           |            |                        |      |                        |      |      |
| College Creek                                           | 13       | 63.227 | 145.485 | GL   | A20       | <0.45um    | 7.9 |           |            | <b>0.01</b>            | 0.06 | <b>0.00</b>            | 0.13 | *    |
| Ibeck Creek                                             | 27       | 60.508 | 145.541 | GL   | A23       | <0.45um    | 7.5 | 720.0     |            | <b>0.13</b>            | 0.06 | <b>0.24</b>            | 0.13 | *    |
| Kotsina River                                           | 9        | 61.581 | 144.408 | GL   | A21       | <0.45um    | 7.7 | 500.0     |            | <b>0.00</b>            | 0.06 | <b>0.02</b>            | 0.13 | *    |
| Kuskulana River                                         | 12       | 61.556 | 144.022 | GL   | A17       | <0.45um    | 8   | 200.0     |            | <b>0.06</b>            | 0.06 | <b>0.06</b>            | 0.13 | *    |
| McCarthy Creek                                          | 23       | 61.431 | 142.926 | GL   | A16       | <0.45um    | 8   | 30.0      |            | <b>0.34</b>            | 0.06 | <b>0.26</b>            | 0.13 | *    |
| Meterasbe River                                         | 35       |        |         | GL   | AK-08     | <0.2um     |     | 3.0       |            | <b>0.05</b>            | 0.17 | <b>0.10</b>            | 0.86 |      |
| Knik River                                              | 34       |        |         | GL   | AK-11     | <0.2um     |     | 3.0       |            | <b>-0.01</b>           | 0.22 | <b>-0.13</b>           | 0.30 |      |
|                                                         |          |        |         |      | A18       | <0.45um    |     | 50.0      | 0.66       | <b>0.22</b>            | 0.06 | <b>0.31</b>            | 0.13 | *    |
| Strerler Creek                                          | 18       |        |         | GL   | AK-04     | <0.2um     |     | 4.0       |            | <b>0.34</b>            | 0.15 | <b>0.44</b>            | 0.26 |      |
| Matanuska River                                         | Mat      |        |         | GL   | A15       | <0.45um    |     | 180.0     |            | <b>0.06</b>            | 0.15 | <b>0.12</b>            | 0.32 |      |
| Airport Creek                                           | 29       | 60.461 | 145.293 | BB   | A11       | <0.45um    | 7.3 | 230.0     | 3.2        | <b>-0.56</b>           | 0.06 | <b>-0.87</b>           | 0.13 | *    |
|                                                         |          |        |         |      | AK-03     | <0.2um     | 7.3 | 317.4     |            | <b>-0.83</b>           | 0.05 | <b>-1.21</b>           | 0.14 |      |
|                                                         |          |        |         |      | A10       | <0.02um    | 7.3 | 110.0     |            | <b>-1.60</b>           | 0.06 | <b>-2.37</b>           | 0.13 |      |
| Eyak River                                              | 28       | 60.529 | 145.64  | BB   | A9        | <0.45um    | 7.3 | 420.0     | 4.99       | <b>-1.17</b>           | 0.06 | <b>-1.71</b>           | 0.13 | *    |
|                                                         |          |        |         |      | A19       | <0.02um    | 7.3 | 300.0     |            | <b>-1.73</b>           | 0.15 | <b>-2.58</b>           | 0.32 |      |
|                                                         |          |        |         |      | AK-13     | <0.2um     | 7.3 | 402.5     |            | <b>-1.12</b>           | 0.08 | <b>-1.70</b>           | 0.20 |      |
| Gulkana River                                           | 16       | 62.27  | 145.385 | BB   | A5        | <0.45um    | 7.7 | 60.0      | 5.56       | <b>-0.21</b>           | 0.12 | <b>-0.29</b>           | 0.24 | *    |
|                                                         |          |        |         |      | A2        | <0.02um    | 7.7 | 15.0      |            | <b>-0.05</b>           | 0.15 | <b>-0.13</b>           | 0.32 |      |
| Swampy Creek                                            | 31       | 60.435 | 145.214 | BB   | A24       | <0.45um    | 7.4 |           |            | <b>-0.03</b>           | 0.06 | <b>-0.09</b>           | 0.13 | *    |
| Tolsona Creek                                           | 17       | 62.101 | 145.969 | BB   | A7        | <0.45um    | 7.6 | 100.0     |            | <b>0.11</b>            | 0.15 | <b>0.07</b>            | 0.32 | *    |
|                                                         |          |        |         |      | A6        | <0.02um    | 7.6 | 40.0      |            | <b>-0.01</b>           | 0.12 | <b>0.05</b>            | 0.24 |      |
| Willow Creek                                            | 4        | 61.817 | 145.216 | BB   | A3        | <0.45um    | 7.3 | 100.0     | 7.6        | <b>-0.40</b>           | 0.15 | <b>-0.69</b>           | 0.32 | *    |
|                                                         |          |        |         |      | A8        | <0.02um    | 7.3 | 70.0      |            | <b>-0.18</b>           | 0.06 | <b>-0.32</b>           | 0.13 |      |
| Tractor Creek                                           | 25       | 61.388 | 143.197 | BM   | A4        | <0.45um    | 6.9 | 35.0      |            | <b>0.68</b>            | 0.12 | <b>0.99</b>            | 0.24 |      |
| Klutina River                                           | 3        | 61.954 | 145.322 | LK   | AK-06     | <0.2um     | 7.4 | 7.5       |            | <b>0.16</b>            | 0.06 | <b>0.23</b>            | 0.16 |      |
| Tazlina River                                           | 2        | 62.054 | 145.426 | LK   | A12       | <0.45um    | 7.4 | 140.0     | 0.35       | <b>0.36</b>            | 0.06 | <b>0.51</b>            | 0.13 | *    |
|                                                         |          |        |         |      | AK-12     | <0.2um     |     | 99.1      |            | <b>0.05</b>            | 0.10 | <b>0.11</b>            | 0.28 |      |
| Tonsina River                                           | 6        | 61.663 | 145.183 | LK   | A13       | <0.45um    | 7.4 | 140.0     | 0.52       | <b>0.03</b>            | 0.06 | <b>0.02</b>            | 0.13 | *    |
| Clear Creek                                             | 24       |        |         | MW   | AK-05     | <0.2um     |     | 1.0       |            | <b>-0.12</b>           | 0.19 | <b>-0.11</b>           | 0.56 |      |
| Glacial meltwater                                       | St32     |        |         | MW   | AK-02     | <0.2um     |     | 2.2       |            | <b>-0.81</b>           | 0.23 | <b>-1.21</b>           | 0.43 |      |

Sampling date between 8/19/2008 and 8/27/2008

Type "GL": glacial; Type "LK": proglacial lake fed; Type "BB": boreal blackwater; Type "BM": boreal montane, Type "MW": meltwater

(\*) Reference from Schroth et al., 2011

Table S3: List of sampled waters from the Lena and Ob and their main characteristics and chemical compositions

| River | Water ID  | Date (m/d/yr) | Discharge (km <sup>3</sup> /d) | Water Temp (°C) | DOC (mg/L) | Ca (mg/L) | Sr (ug/L) | Ba (ug/L) | Al (ug/L) | Mn (ug/L) | Fe (ug/L)    | $\delta^{56}\text{Fe}$ | 2SD          | $\delta^{57}\text{Fe}$ | 2SD  |
|-------|-----------|---------------|--------------------------------|-----------------|------------|-----------|-----------|-----------|-----------|-----------|--------------|------------------------|--------------|------------------------|------|
| Lena  | SK1       | 5/26/2007     | 2.08                           | 5.9             | 13.11      | 12.00     | 128.3     | 15.96     | 22.1      | 66.2      | 334          | <b>-0.05</b>           | 0.02         | <b>0.02</b>            | 0.07 |
|       | SK2       | 5/27/2007     | 3.15                           | 5.2             | 14.66      | 12.82     | 141.1     | 17.40     | 24.4      | 75.0      | 359          | <b>-0.10</b>           | 0.02         | <b>-0.01</b>           | 0.16 |
|       | SK3       | 5/28/2007     | 4.94                           | 5.4             | 14.97      | 12.48     | 129.2     | 17.07     | 23.2      | 76.6      | 363          | <b>-0.24</b>           | 0.05         | <b>-0.32</b>           | 0.13 |
|       | SK4       | 5/29/2007     | 6.22                           | 6.4             | 14.91      | 9.69      | 92.8      | 14.57     | 26.1      | 69.1      | 443          | <b>-0.16</b>           | 0.06         | <b>-0.25</b>           | 0.08 |
|       | SK5       | 5/30/2007     | 7.01                           | 7.4             | 15.59      | 9.15      | 86.8      | 14.23     | 27.7      | 66.6      | 459          | <b>-0.01</b>           | 0.09         | <b>0.14</b>            | 0.13 |
|       | SK6       | 5/31/2007     | 7.78                           | 8.9             | 17.05      | 9.53      | 89.9      | 14.51     | 29.2      | 62.6      | 457          | <b>-0.20</b>           | 0.07         | <b>-0.16</b>           | 0.10 |
|       | SK7       | 6/1/2007      | 8.64                           | 9.7             | 16.73      | 9.12      | 83.2      | 14.19     | 29.3      | 43.8      | 377          | <b>-0.12</b>           | 0.04         | <b>-0.09</b>           | 0.11 |
|       | SK8       | 6/2/2007      | 8.50                           | 13.1            | 16.20      | 8.29      | 83.6      | 12.57     | 29.2      | 33.5      | 345          | <b>-0.07</b>           | 0.04         | <b>0.15</b>            | 0.08 |
|       | SK9       | 6/4/2007      | 8.03                           | 13.7            | 16.25      | 9.19      | 91.9      | 13.82     | 29.9      | 30.9      | 324          | <b>-0.04</b>           | 0.04         | <b>-0.04</b>           | 0.08 |
|       | SK10      | 6/5/2007      | 9.50                           | 9.7             | 18.22      | 7.67      | 70.9      | 12.61     | 30.1      | 24.6      | 301          | <b>-0.07</b>           | 0.03         | <b>-0.04</b>           | 0.10 |
|       | SK11      | 6/6/2007      | 8.99                           | 11.1            | 20.66      | 8.96      | 89.4      | 13.50     | 28.6      | 23.7      | 287          | <b>-0.10</b>           | 0.02         | <b>-0.20</b>           | 0.02 |
|       | SK12      | 6/8/2007      | 7.67                           | 11.1            | 16.31      | 9.15      | 80.0      | 11.79     | 29.4      | 15.5      | 249          | <b>-0.18</b>           | 0.09         | <b>-0.24</b>           | 0.09 |
|       | SK13      | 6/9/2007      | 7.49                           | 9.2             | 17.00      | 9.01      | 75.4      | 11.83     | 25.7      | 14.9      | 228          | <b>-0.05</b>           | 0.16         | <b>-0.04</b>           | 0.06 |
|       | SK14      | 6/10/2007     | 7.38                           |                 | 17.46      | 7.86      | 71.1      | 11.01     | 25.4      | 13.7      | 217          | <b>-0.14</b>           | 0.08         | <b>0.03</b>            | 0.19 |
|       | SK15      | 6/11/2007     | 7.23                           |                 | 16.64      | 9.36      | 76.5      | 11.82     | 21.9      | 14.6      | 225          | <b>-0.11</b>           | 0.04         | <b>-0.07</b>           | 0.02 |
| Ob'   | SK1       | 5/29/2007     | 3.21                           | 6.0             | 9.37       | 3.95      | 27.4      | 5.12      | 27.2      | 90.7      | 592          | <b>-0.29</b>           | 0.12         | <b>-0.32</b>           | 0.13 |
|       | SK2       | 5/30/2007     | 3.20                           | 6.0             | 9.86       | 3.72      | 24.6      | 4.60      | 31.4      | 118.3     | 663          | <b>-0.25</b>           | 0.05         | <b>-0.28</b>           | 0.07 |
|       | SK3       | 5/31/2007     | 3.14                           | 7.0             | 10.79      | 2.67      | 18.8      | 3.78      | 41.2      | 95.6      | 764          | <b>-0.11</b>           | 0.06         | <b>-0.18</b>           | 0.08 |
|       | SK4       | 6/1/2007      | 3.14                           | 7.0             | 11.19      | 2.80      | 17.8      | 3.78      | 49.2      | 74.3      | 746          | <b>-0.09</b>           | 0.05         | <b>-0.10</b>           | 0.07 |
|       | SK5       | 6/2/2007      | 3.13                           | 7.0             | 10.89      | 2.46      | 15.5      | 4.72      | 36.4      | 33.3      | 653          | <b>-0.12</b>           | 0.04         | <b>-0.20</b>           | 0.04 |
|       | SK6       | 6/3/2007      | 3.11                           | 5.0             | 11.16      | 2.00      | 13.3      | 3.54      | 53.7      | 41.2      | 736          | <b>-0.12</b>           | 0.04         | <b>-0.13</b>           | 0.10 |
|       | SK7       | 6/4/2007      | 3.08                           | 5.0             | 10.65      | 2.15      | 14.3      | 5.22      | 54.1      | 45.0      | 843          | <b>-0.13</b>           | 0.04         | <b>-0.11</b>           | 0.10 |
|       | SK8       | 6/5/2007      | 3.03                           | 8.0             | 10.65      | 1.91      | 11.8      | 4.88      | 50.2      | 35.2      | 692          | <b>-0.12</b>           | 0.04         | <b>-0.13</b>           | 0.10 |
|       | SK9       | 6/6/2007      | 3.02                           | 9.0             | 10.70      | 2.03      | 12.4      | 3.48      | 51.6      | 27.4      | 690          | <b>-0.11</b>           | 0.04         | <b>-0.28</b>           | 0.04 |
|       | SK10      | 6/7/2007      | 3.02                           | 10.0            | 10.16      | 2.42      | 15.3      | 3.68      | 50.8      | 33.9      | 657          | <b>-0.07</b>           | 0.09         | <b>-0.11</b>           | 0.14 |
|       | SK11      | 6/8/2007      | 3.02                           | 11.0            | 9.88       | 2.05      | 13.5      | 4.46      | 54.7      | 38.9      | 637          | <b>-0.03</b>           | 0.05         | <b>-0.01</b>           | 0.15 |
|       | SK12      | 6/9/2007      | 3.01                           | 9.0             | 9.94       | 2.28      | 15.8      | 5.13      | 55.1      | 36.3      | 678          | <b>0.01</b>            | 0.04         | <b>-0.10</b>           | 0.09 |
|       | SK13      | 6/10/2007     | 3.00                           | 9.8             | 10.51      | 3.68      | 29.0      | 7.02      | 33.4      | 33.5      | 533          | <b>-0.05</b>           | 0.06         | <b>0.10</b>            | 0.05 |
|       | SK14      | 6/11/2007     | 3.00                           | 10.0            | 10.48      | 3.02      | 21.6      | 6.15      | 29.4      | 18.7      | 573          | <b>-0.08</b>           | 0.02         | <b>-0.13</b>           | 0.05 |
|       | SK15      | 6/12/2007     | 3.01                           | 10.0            | 11.20      | 2.07      | 11.6      | 3.08      | 45.2      | 13.3      | 667          | <b>-0.13</b>           | 0.02         | <b>-0.03</b>           | 0.04 |
| SK16  | 6/13/2007 | 3.01          | 10.0                           | 11.47           | 2.39       | 15.5      | 4.46      | 39.8      | 11.1      | 598       | <b>-0.08</b> | 0.01                   | <b>-0.07</b> | 0.01                   |      |
| SK17  | 6/14/2007 | 3.01          | 11.0                           | 11.48           | 2.20       | 14.4      | 3.59      | 48.3      | 15.1      | 717       | <b>-0.13</b> | 0.11                   | <b>-0.13</b> | 0.08                   |      |
| SK18  | 6/15/2007 | 3.08          | 11.0                           | 10.90           | 1.99       | 12.9      | 3.26      | 43.1      | 12.9      | 486       | <b>-0.06</b> | 0.04                   | <b>-0.05</b> | 0.14                   |      |
| SK19  | 6/16/2007 | 3.10          | 11.5                           | 11.27           | 3.33       | 23.5      | 4.86      | 39.1      | 18.3      | 566       | <b>-0.10</b> | 0.07                   | <b>-0.21</b> | 0.08                   |      |
| SK20  | 6/17/2007 | 3.11          | 11.5                           | 11.21           | 2.72       | 18.0      | 3.96      | 43.4      | 19.2      | 597       | <b>-0.15</b> | 0.03                   | <b>-0.12</b> | 0.01                   |      |

Table S4: Chemical composition and pH of sampled waters from the White Sea watershed for different filtration size

| Zone      | River                    | Type / Flow | Water ID   | Filtration | pH       | DOC (mg/L) | Ca (mg/L) | Mg (mg/L) | Na (mg/L) | Sr (ug/L) | Al (ug/L) | Mn (ug/L)    | Fe (ug/L)    | $\delta^{56}\text{Fe}$ | 2SD         |              |      |
|-----------|--------------------------|-------------|------------|------------|----------|------------|-----------|-----------|-----------|-----------|-----------|--------------|--------------|------------------------|-------------|--------------|------|
| Zone 1    | Ruiga                    | II / BF     | 9          | <2.5um     | 5.92     | 34.4       | 1.84      | 2.93      | 2.23      | 13.3      | 749.8     | 131.5        | 2660.0       | <b>-0.09</b>           | 0.09        |              |      |
|           |                          |             |            | <100kD/UF  | 6.67     | 32.8       | 1.84      | 2.91      | 2.29      | 12.8      | 717.0     | 149.4        | 1805.0       | <b>0.37</b>            | 0.09        |              |      |
|           |                          |             |            | <10kD/UF   | 6.46     | 32.0       | 1.82      | 2.87      | 2.40      | 12.5      | 696.4     | 145.5        | 1290.0       | <b>0.42</b>            | 0.12        |              |      |
|           |                          |             |            | <1kD/UF    | 6.75     | 13.0       | 1.27      | 2.36      | 2.48      | 8.3       | 240.8     | 106.5        | 219.0        | <b>-0.07</b>           | 0.28        |              |      |
|           | Ladreka                  | II / BF     | 23         | <2.5um     | 7.5      | 41.3       | 4.23      | 3.45      | 33.73     | 35.0      | 439.3     | 115.8        | 3279.0       | <b>0.14</b>            | 0.06        |              |      |
|           |                          |             |            | <0.22um    | 7.5      | 39.8       | 3.93      | 3.29      | 34.99     | 32.1      | 235.6     | 118.2        | 1088.0       | <b>0.63</b>            | 0.08        |              |      |
|           |                          |             |            | <100 kD UF | 7.47     | 40.1       | 4.17      | 3.40      | 33.22     | 33.3      | 270.4     | 102.1        | 1453.0       | <b>0.58</b>            | 0.08        |              |      |
|           |                          |             |            | <10kD UF   | 7.51     | 39.4       | 2.30      | 2.35      | 31.77     | 25.6      | 136.3     | 72.6         | 530.6        | <b>0.83</b>            | 0.06        |              |      |
|           |                          |             |            | III / BF   | Y-1      | <2.5 um    | 6.14      | 91.2      | 2.68      | 6.20      | 46.86     | 47.0         | 1491.0       | 20.5                   | 535.3       | <b>0.50</b>  | 0.03 |
|           |                          |             |            |            |          | <0.2 um    |           | 78.9      | 2.27      | 4.45      | 40.15     | 38.4         | 1020.6       | 16.6                   | 404.9       | <b>0.79</b>  | 0.03 |
|           | <10kD dial               |             | 15.4       |            |          | 1.35       | 3.67      | 39.02     | 26.4      | 370.0     | 10.2      | 63.1         | <b>1.31</b>  | 0.10                   |             |              |      |
|           |                          |             |            | <1kD dial  |          |            | 1.17      | 3.22      | 37.39     | 21.6      | 191.8     | 7.9          | 24.8         | <b>1.58</b>            | 0.13        |              |      |
|           |                          |             |            | IV / BF    | Y-2      | <0.22 um   | 7.44      | 4.0       | 22.97     | 8.40      | 13.22     | 112.1        | 1.7          | 439.6                  | 603.5       | <b>0.37</b>  | 0.10 |
|           |                          |             |            |            |          | <5um       | 6.04      | 31.3      | 3.70      | 3.12      | 11.89     | 34.9         | 480.2        | 129.3                  | 1337.2      | <b>0.24</b>  | 0.04 |
|           | Yukovo & local water     |             |            |            | <0.22um  |            | 19.7      | 4.53      |           |           | 34.1      | 356.9        | 125.0        | 1117.3                 | <b>0.24</b> | 0.12         |      |
| III / BF  |                          |             |            |            | Y-3      | <10kD dial |           | 8.2       | 2.83      | 2.66      | 26.30     | 29.3         | 107.2        | 96.4                   | 93.3        | <b>0.69</b>  | 0.09 |
|           |                          |             |            |            |          | <1kD dial  |           | 5.1       | 3.73      |           |           | 28.2         | 68.1         | 93.4                   | 46.3        | <b>0.86</b>  | 0.14 |
| IV / BF   |                          |             |            |            | Y-4      | <2.5 um    |           | 76.4      | 214.46    |           |           | 2983.6       | 2423.0       | 1474.5                 | 9016.7      | <b>-1.04</b> | 0.16 |
|           | <1.2 um                  |             | 67.7       | 49.40      |          |            |           | 755.5     | 634.5     | 409.1     | 2757.3    | <b>-1.09</b> | 0.05         |                        |             |              |      |
| Zone 2    | Peschanaya & local water |             |            | <10kD dial |          | 50.3       | 60.19     |           |           | 740.3     | 235.1     | 317.5        | 416.0        | <b>-1.19</b>           | 0.08        |              |      |
|           |                          |             |            | <10kD dial |          | 50.3       | 60.19     |           |           | 740.3     | 235.1     | 317.5        | 416.0        | <b>-1.29</b>           | 0.10        |              |      |
|           |                          |             |            | <1kD dial  |          | 46.7       | 59.00     |           |           | 720.5     | 170.6     | 306.1        | 279.9        | <b>-1.28</b>           | 0.06        |              |      |
|           |                          |             |            | <0.22 um   | 3.92     | 47.6       | 2.15      | 0.97      | 6.68      | 12.5      | 890.4     | 45.3         | 1072.1       | <b>0.24</b>            | 0.03        |              |      |
|           | IV / BF                  | Y-5         | <10kD      |            | 21.5     | 1.30       |           |           | 8.9       | 417.8     | 32.7      | 479.6        | <b>-0.69</b> | 0.08                   |             |              |      |
|           |                          |             | <1kD dial  |            | 17.0     | 1.07       | 0.63      | 5.24      | 7.7       | 302.1     | 28.1      | 392.8        | <b>-0.83</b> | 0.15                   |             |              |      |
|           | III / BF                 | s32         | <0.45um    | 4.18       | 32.5     | 0.93       | 0.88      | 4.07      | 7.3       | 192.2     | 39.1      | 816.7        | <b>-0.30</b> | 0.08                   |             |              |      |
|           |                          |             | <0.45 um   | 4.43       | 63.2     | 0.85       | 1.15      | 5.49      | 8.9       | 99.6      | 4.4       | 350.2        | <b>-0.24</b> | 0.13                   |             |              |      |
|           | IV / BF                  | s40         | <1 kD UF   |            | 28.8     | 0.96       | 0.91      |           | 6.7       | 49.2      | 4.0       | 107.7        | <b>-0.07</b> | 0.08                   |             |              |      |
|           |                          |             | <0.22um    | 7.17       | 14.9     | 37.36      | 8.62      | 14.03     | 375.5     | 112.3     | 44.2      | 372.8        | <b>-0.01</b> | 0.09                   |             |              |      |
|           | Severnaya Dvina          | I / BF      | A-3        | <10kD UF   |          | 6.7        | 37.25     | 8.44      | 14.26     | 390.3     | 58.8      | 44.3         | 62.8         | <b>0.24</b>            | 0.07        |              |      |
|           |                          |             |            | <10kD dial |          | 6.8        | 36.58     | 8.28      | 14.05     | 380.6     | 36.5      | 40.3         | 18.9         | <b>-0.02</b>           | 0.03        |              |      |
|           |                          |             |            | <1kD UF    |          | 4.6        | 33.43     | 7.53      | 12.72     | 355.6     | 34.5      | 37.9         | 5.0          | <b>0.28</b>            | 0.12        |              |      |
|           |                          |             |            | <1kD dial  |          | 9.6        | 35.86     | 8.13      | 13.76     | 375.1     | 34.8      | 40.1         | 16.3         | <b>-0.09</b>           | 0.10        |              |      |
|           |                          | I / HF      | A-18       | <0.22 um   | 7.66     | 18.6       | 11.60     | 2.81      | 1.75      | 106.6     | 268.8     | 36.6         | 564.7        | <b>0.55</b>            | 0.09        |              |      |
| <10kDa UF |                          |             |            |            | 14.1     | 11.11      | 2.63      | 1.69      | 103.0     | 57.9      | 12.5      | 89.0         | <b>0.89</b>  | 0.10                   |             |              |      |
| Zone 3    | I / BF                   | A-28        | <0.22 um   |            | 20.2     | 18.52      | 4.09      | 4.50      | 163.0     | 40.7      | 24.6      | 231.9        | <b>-0.01</b> | 0.08                   |             |              |      |
|           |                          |             | <0.22 um   | 4.15       |          | 0.31       | 0.22      | 1.34      | 2.2       | 112.1     | 8.4       | 232.3        | <b>0.31</b>  | 0.06                   |             |              |      |
|           | IV / HF                  | A-19        | <100kDa UF |            | 23.8     | 0.30       | 0.21      | 1.29      | 2.2       | 98.9      | 7.0       | 192.5        | <b>0.27</b>  | 0.06                   |             |              |      |
|           |                          |             | <10kDa UF  |            | 20.5     | 0.23       | 0.18      | 1.25      | 1.6       | 55.8      | 6.1       | 87.0         | <b>0.11</b>  | 0.10                   |             |              |      |
|           | III / HF                 | A-20        | <0.22 um   | 4.22       | 21.2     | 0.29       | 0.19      | 1.09      | 2.0       | 110.9     | 10.2      | 226.8        | <b>0.01</b>  | 0.08                   |             |              |      |
|           |                          |             | <0.22 um   | 7.34       | 6.5      | 44.75      | 9.90      | 9.22      | 1041.4    | 17.2      | 22.4      | 137.8        | <b>-0.09</b> | 0.11                   |             |              |      |
| Pinega    | I / BF                   | A-7         | <10kD UF   |            | 3.8      | 43.96      | 9.74      | 9.18      | 1051.0    | 9.7       | 21.6      | 25.4         | <b>0.06</b>  | 0.04                   |             |              |      |
|           |                          |             | <1kD UF    |            | 2.2      | 39.46      | 8.78      | 8.60      | 953.7     | 17.0      | 18.9      | 12.8         | <b>-0.05</b> | 0.04                   |             |              |      |
|           |                          |             | I / HF     | A-27       | <0.22 um |            | 17.1      | 11.11     | 2.36      | 1.37      | 166.4     | 116.5        | 4.1          | 150.2                  | <b>0.64</b> | 0.21         |      |
| Sotka     | I / BF                   | A-8         | <0.22 um   | 7.61       | 3.9      | 319.48     | 14.81     | 4.66      | 3797.5    | 6.3       | 16.8      | 36.3         | <b>0.34</b>  | 0.06                   |             |              |      |
|           |                          |             | I / HF     | A-25       | <0.22 um | 7.55       | 15.1      | 122.70    | 3.99      | 1.28      | 1099.0    | 87.8         | 22.1         | 231.2                  | <b>0.31</b> | 0.17         |      |

Type I: Large rivers 100 - 500,000 km<sup>2</sup>, Type II: Small rivers, S < 50 km<sup>2</sup>; Type III: Semi-permanent streams (1 - 10 km<sup>2</sup>)

Type IV: Stagnant (soil, wetland) water, soil pits close to coast high DOC

BF: Base flow, HF: High Flow
